# Supplementary material for: Molecular nitrogen in N-doped TiO2 nanoribbons
Source: Royal Society of Chemistry journal article supplement (doi:10.1039/c4ra14410d), 2015-01-01
Supplement: c4ra14410d1.pdf [file c4ra14410d1.pdf]

## Molecular Nitrogen in N-doped TiO<sub>2</sub>

C. Bittencourt<sup>1</sup>, M. Rutar<sup>2,3</sup>, P. Umek<sup>2</sup>, A. Mrzel<sup>2</sup>, K. Vozel<sup>2</sup>, D. Arčon<sup>2, 5</sup>, K. Henzler<sup>4</sup>, P. Krüger<sup>6</sup> and P. Guttman<sup>4</sup>

<sup>1</sup>Chimie des Interactions Plasma Surface, CIRMAP, University of Mons, 23 Place du Parc, B-7000 Mons, Belgium

<sup>2</sup>Jožef Stefan Institute, Jamova cesta 39, SI-1000 Ljubljana, Slovenia

<sup>3</sup>Jožef Stefan International Postgraduate School, Jamova cesta 39, SI-1000 Ljubljana, Slovenia

<sup>4</sup>Helmholtz-Zentrum Berlin für Materialien und Energie GmbH, Institute for Soft Matter and Functional Materials, Albert-Einstein-Str. 15, D-12489 Berlin, Germany

<sup>5</sup> Faculty of mathematics and physics, University of Ljubljana, Jadranska cesta 19, SI-1000Ljubljana, Slovenia

<sup>6</sup> Graduate School of Advanced Integration Science, Chiba University, Chiba 263-8522, Japan.

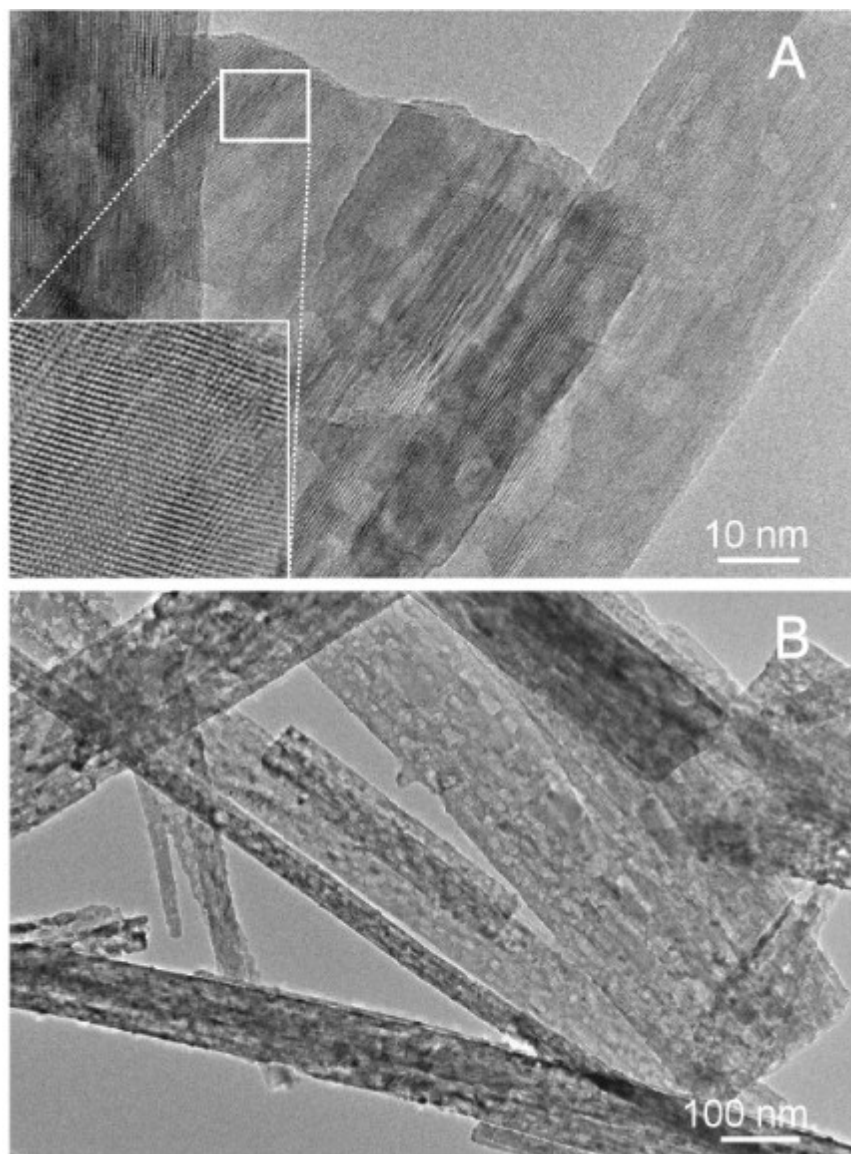

**Figure S1:** TEM images of N-doped TiO<sub>2</sub> nanoribbons synthesized from hydrogen titanate nanoribbons by calcination in an NH<sub>3</sub>(g)/Ar(g) flow at A) 580 °C B) and 650 °C. A HRTEM insert in image (A) reveals crystalline nature of the N-doped TiO<sub>2</sub> nanoribbons.

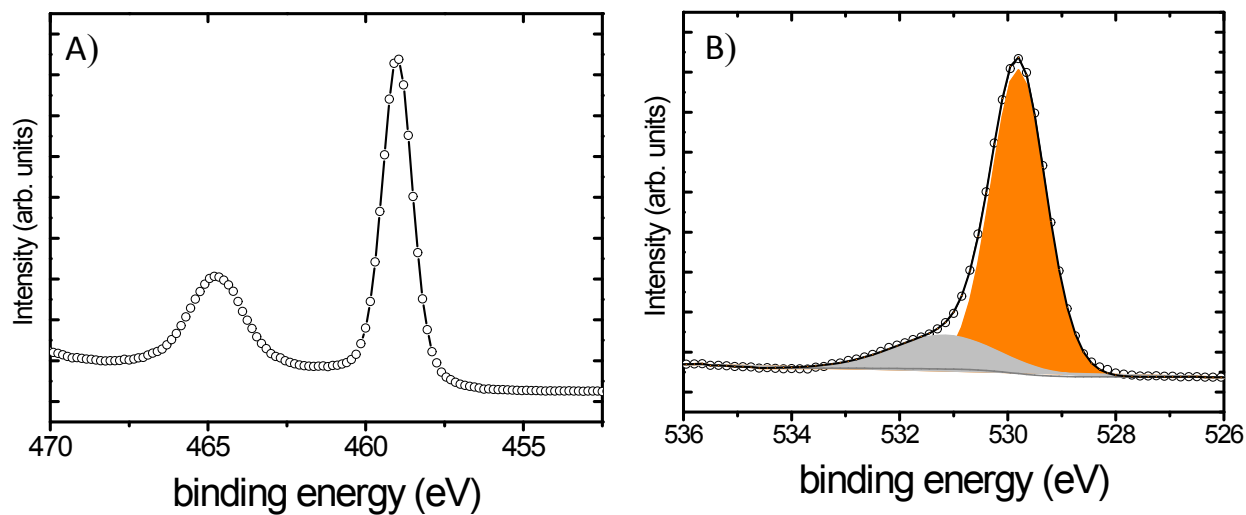

**Figure S2:** XPS spectra recorded on N400-6h; A) Ti 2p and B) O 1s.

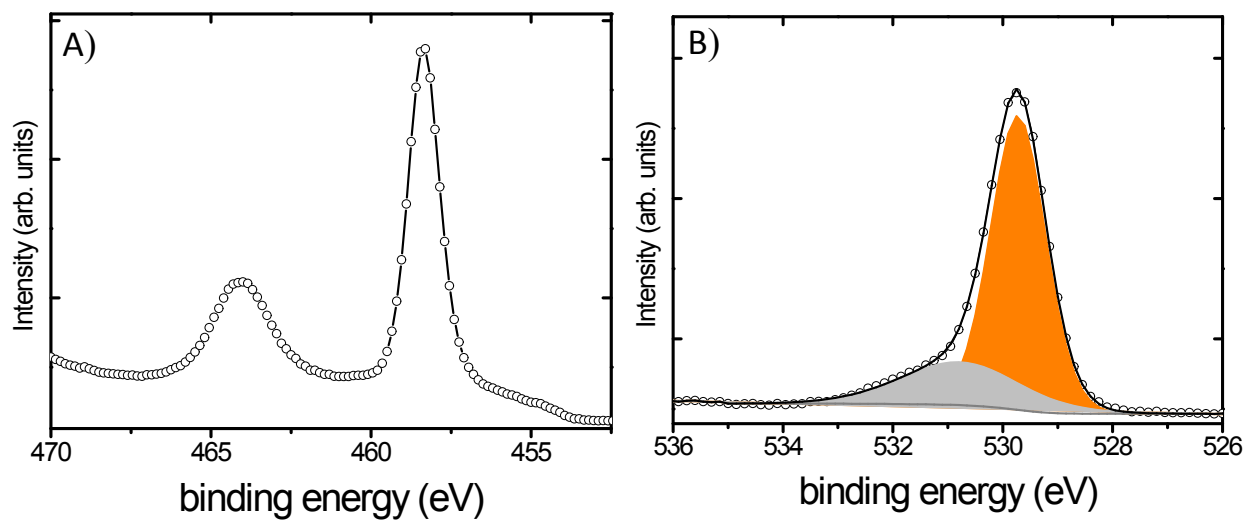

**Figure S3:** XPS spectra recorded on N650-4h; A) Ti 2p and B) O 1s.

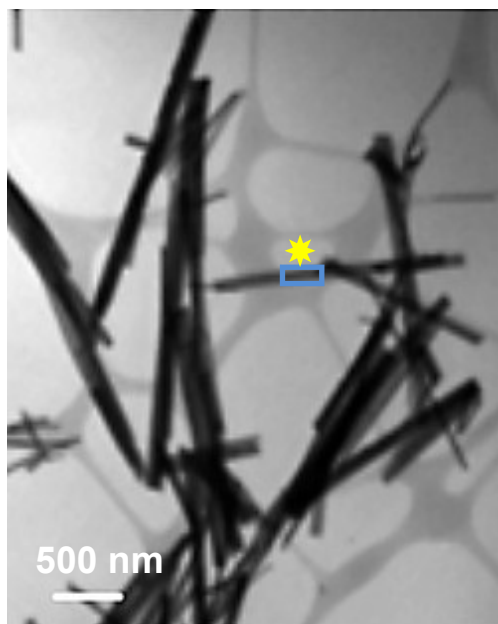

**Figure S4:** X-ray image at 465.4 eV from an image stack recorded on **N580-6h** at the U41 beamline by using the TXM. The NEXAFS–TXM (Ti L-edge (see **Figure S5**) and N K-edge (see **Figure 5**)) spectra were recorded in the area delimited by the rectangle. The yellow spot indicates the point at which the  $I_0$  was recorded.

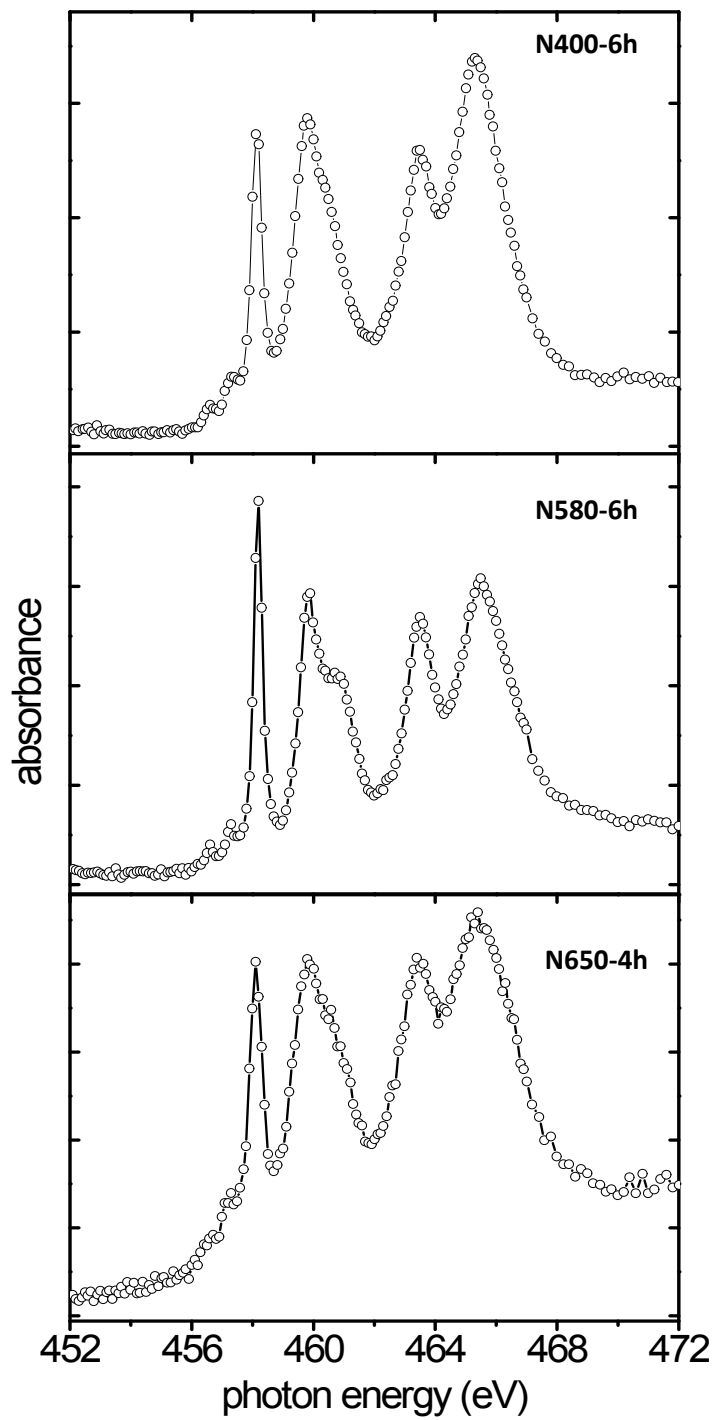

**Figure S5:** Ti L-edge NEXAFS-TXM spectra recorded on N400-6h, N580-6h and N650-4h.
